# Supplementary material for: Docetaxel Combined with Thymoquinone Induces Apoptosis in Prostate Cancer Cells via Inhibition of the PI3K/AKT Signaling Pathway
Source: MDPI journal article supplement (doi:10.3390/cancers11091390), 2019-09-18
Supplement: s1 [file s1]

# Supplementary Materials: Docetaxel Combined with Thymoquinone Induces Apoptosis in Prostate Cancer Cells via Inhibition of the PI3K/AKT Signaling Pathway

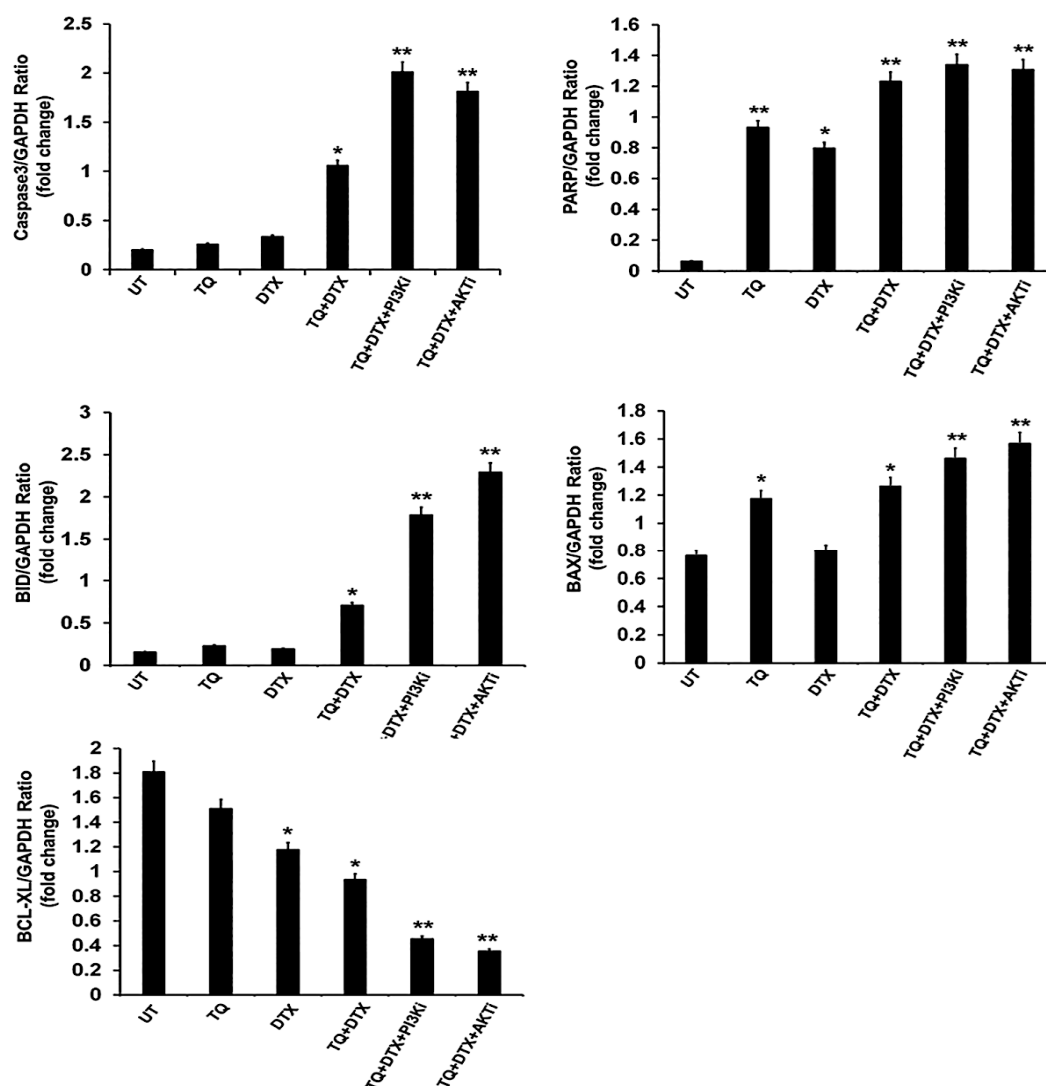

|              | Casapase<br>3/GAPDH | PARP/GAPD<br>H | BID/GAPD<br>H | BAX/GAPD<br>H | BCL-<br>XL/GAPDH |
|--------------|---------------------|----------------|---------------|---------------|------------------|
| UT           | 0.199001332         | 0.061318242    | 0.152263648   | 0.76424767    | 1.805725699      |
| TQ           | 0.258747493         | 0.930168635    | 0.229997771   | 1.1746527     | 1.510734715      |
| DTX          | 0.336275146         | 0.795392602    | 0.192083063   | 0.801038287   | 1.175989617      |
| TQ+DTX       | 1.058038099         | 1.229244555    | 0.703578423   | 1.262120942   | 0.933950507      |
| TQ+DTX+PI3Ki | 2.009865869         | 1.339430218    | 1.787163286   | 1.461478772   | 0.452887706      |
| TQ+DTX+AKTi  | 1.81316001          | 1.306669809    | 2.288852227   | 1.566203158   | 0.354041951      |

(i) Densitometry Readings/intensity Ratio (DU145)

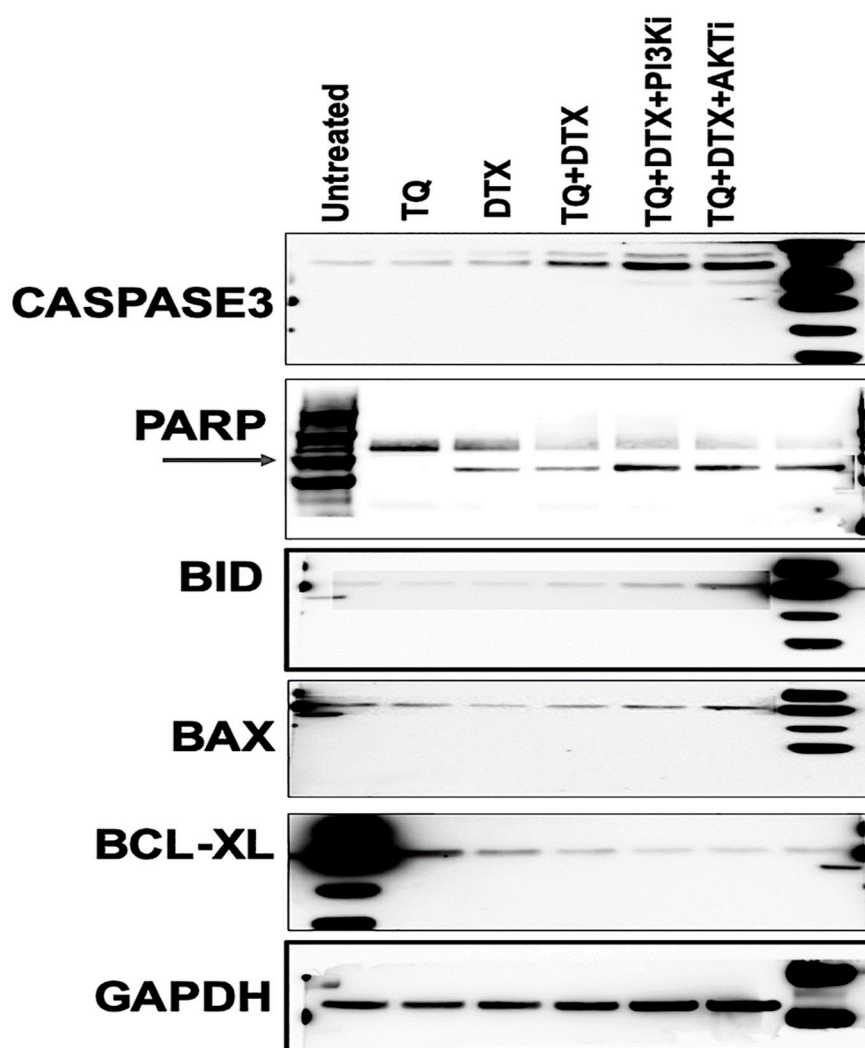

(ii)

**Figure S1.** Western blots and densitometry analysis of pro- and anti-apoptotic markers in DU145 cells. PCa cells were treated with thymoquinone (TQ), docetaxel (DTX), or their combination (TQ+DTX) in the presence or absence of PI3Ki and AKTi inhibitors for 48 h. An equal amount of protein (30  $\mu$ g) was fractionated on 4–12% polyacrylamide gels and transferred to PVDF membranes. The band intensity of pro-apoptotic (BAX, BID), apoptotic (Caspase3), PARP, and anti-apoptotic (BCL-XL) protein were analyzed by (i) densitometry readings/intensity ratio, using ImageJ software (NIH) and were normalized to the corresponding GAPDH value; and (ii) immunoblots, respectively. The results were expressed in relative folds change.

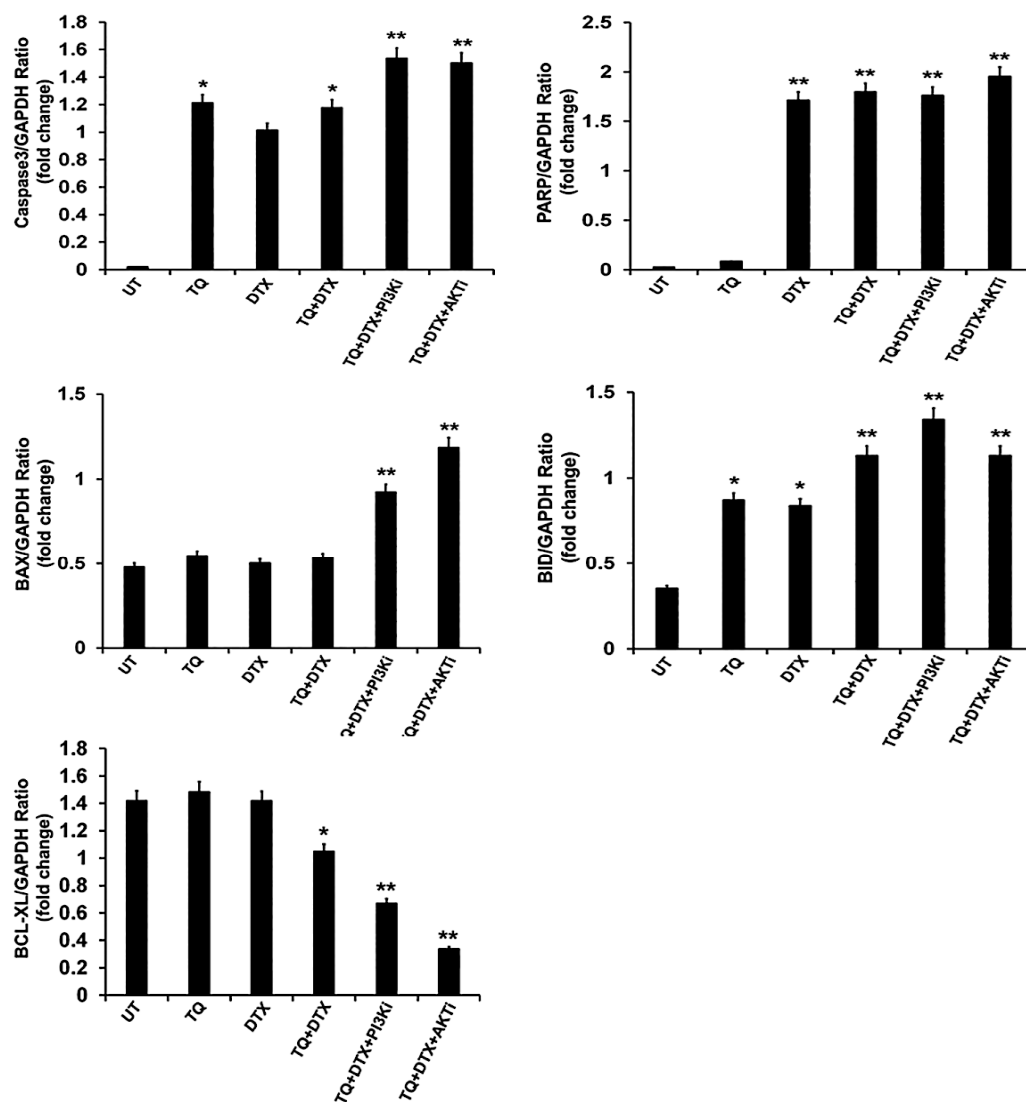

|              | Caspase<br>3/GAPDH | PARP/GAPD<br>H | BID/GAPD<br>H | BAX/GAPD<br>H | BCL-<br>XL/GAPDH |
|--------------|--------------------|----------------|---------------|---------------|------------------|
| UT           | 0.018959088        | 0.026889344    | 0.35210203    | 0.478020201   | 1.418465417      |
| TQ           | 1.210522029        | 0.083796125    | 0.87010211    | 0.546402567   | 1.483277798      |
| DTX          | 1.01275483         | 1.71184061     | 0.83760012    | 0.501231012   | 1.416393662      |
| TQ+DTX       | 1.17628011         | 1.795573869    | 1.130102031   | 0.532870101   | 1.048381737      |
| TQ+DTX+PI3Ki | 1.534560102        | 1.760692403    | 1.340201021   | 0.922307021   | 0.671236338      |
| TQ+DTX+AKTi  | 1.50234501         | 1.951901201    | 1.130503103   | 1.184282021   | 0.336592843      |

(i) Densitometry Readings/intensity Ratio (C42B)

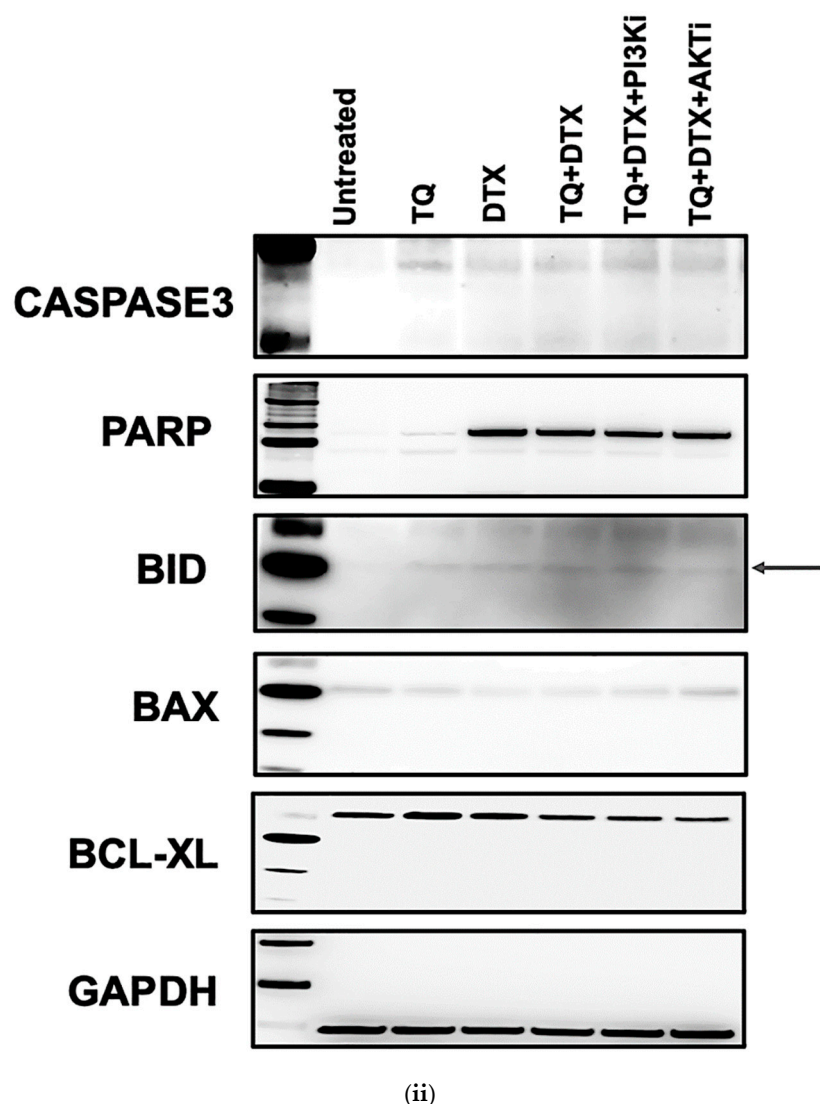

**Figure S2.** Western blot and densitometry analysis of pro- and anti-apoptotic markers in C4-2B cells. PCa cells were treated with thymoquinone (TQ), docetaxel (DTX), or their combination (TQ+DTX) in the presence or absence of PI3Ki and AKTi inhibitors for 48 h. An equal amount of protein (30  $\mu$ g) was fractionated on 4–12% polyacrylamide gels and transferred to PVDF membranes. (i) The band intensity of pro-apoptotic (BAX, BID), apoptotic (Caspase3), PARP, and anti-apoptotic (BCL-XL) protein were analyzed by the densitometry readings/intensity ratio using ImageJ software (NIH) and were normalized to the corresponding GAPDH value; and (ii) immunoblots, respectively. The results were expressed in relative folds change.
